# Supplementary material for: Resonance energy transfer and electron–hole annihilation induced chemiluminescence of quantum dots for amplified immunoassay
Source: Royal Society of Chemistry journal article supplement (doi:10.1039/c8cc06356g), 2018-01-01
Supplement: c8cc06356g1.pdf [file c8cc06356g1.pdf]

Electronic Supplementary Information (ESI) for ChemComm.

This journal is (c) The Royal Society of Chemistry 2018

## **Resonance energy transfer and electron-hole annihilation induced chemiluminescence of quantum dots for amplified immunoassay**

Chen Zong,<sup>a,b†</sup> Jie Wu,<sup>a†</sup> Yang Zang<sup>a</sup> and Huangxian Ju<sup>\*a</sup>

<sup>a</sup> State Key Laboratory of Analytical Chemistry for Life Science, School of Chemistry and Chemical Engineering, Nanjing University, Nanjing 210023, P.R. China.

<sup>b</sup> State Key Laboratory of Natural Medicines, China Pharmaceutical University, Nanjing 210009, P.R. China.

### **Experimental section**

**Materials and reagents.** The biotin functional strand (5'-biotin-TTTTTTTTTT-(CH<sub>2</sub>)<sub>6</sub>-NH<sub>2</sub>-3') was synthesized and purified by Sangon Biotech Shanghai Co., Ltd. (China). Capture antibodies (Ab1) of  $\alpha$ -fetoprotein (AFP) (from mouse, clone No. 102k7) and carcinoembryonic antigen (CEA) (from mouse, clone No. Z-2011), biotinylated detection antibodies (Ab2) of AFP (clone No. 9k5) and CEA (clone No. Z-2012), standard solutions of CEA, AFP, carcinoma antigen 125 (CA 125) and carbohydrate antigen 199 (CA 199) were purchased from Beijing Key-Bio Biotech Co., Ltd. (China). Bis(2,4,6-trichlorophenyl) oxalate (TCPO), 5,5-dimethyl-1-pyrroline *N*-oxide (DMPO), 2,2,6,6-tetramethylpiperidine (TEMP) were obtained from Tokyo Chemical Industry Co., Ltd (Japan). Mono-dispersed carboxyl polystyrene (PS) microspheres (diameter: 50 nm) were supplied by Nanjing Olive Twigs Biotechnology Co., Ltd. (China). Ascorbic acid was purchased from Aladdin Chemical Co., Ltd. (China). Mercapto propionic acid (MPA), N-hydroxysuccinimide (NHS), 1-(3-dimethylaminopropyl)-3-ethylcarbodiimide hydrochloride (EDC), bovine serum albumin (BSA) and avidin were all obtained from Sigma–Aldrich Chemical Co. (St. Louis, MO). Cadmium chloride (CdCl<sub>2</sub>) and tellurium (Te) were from Alfa Aesar China Ltd. Sodium borohydride (NaBH<sub>4</sub>) was purchased from Nanjing Chemical Reagent Co., Ltd. The clinical serum samples were from Jiangsu Cancer Hospital. The ECL immunoassay

reagent kits for reference detection were provided by Roche Diagnostics GmbH (Germany). The aldehyde-modified glass slides for preparing protein chip were purchased from Shanghai Baio Technology Co., Ltd. (China).

Immunoreaction buffer was 0.01 M phosphate buffered saline (PBS) (pH 7.4). Blocking buffer was 0.01 M PBS (pH 7.4) containing 5% BSA. Washing buffer was 0.01 M PBS (pH 7.4) spiked with 0.05% Tween-20. MES buffer (pH 6.0) was used to dissolve EDC and NHS for connection of the amino group and the carboxyl group. Ultrapure water from a Millipore water purification system ( $\geq 18$  M $\Omega$ , Milli-Q, Millipore) was used in all experiments. All other reagents were of analytical grade and used without further purification.

**Apparatus.** X-ray photoelectron spectra (XPS) was acquired using PHI 5000 VersaProbe X-ray photoelectron spectrometer (ULVAC-PHI, Japan). UV-Vis absorption spectra were recorded on a Shimadzu UV-3600 UV-Vis-NIR spectrometer (Shimadzu Co., Japan). Electron paramagnetic resonance (EPR) spectra were measured on an EMX-10/12 spectrometer (Bruker, Germany). Transmission electron microscope (TEM) image was recorded by JEM-2100 instrument (JEOL, Japan). Statistical map of the particle size distribution in TEM image was identified with analyzing software Nano Measurer v1.2.5. An IFFM-E luminescent analyzer (Remax, China) was used to collect the CL signal. A F97XP fluorospectrophotometer (Lengguang Tech., China) was used to record the FL signal. The control levels of CEA in sera were obtained with an automated ECL analyzer (Elecsys 2010, Roche).

**Preparation of MPA-capped CdTe QDs.** CdTe QDs were synthesized according to the previous protocol.<sup>S1</sup> Briefly, 0.125 mmol of Te was dissolved in 15 mL of deionized water, and excess NaBH<sub>4</sub> was added into the solution with N<sub>2</sub> bubbled, until the solution turned to transparent purple, indicating the formation of NaHTe. Simultaneously, 0.375 mM of CdCl<sub>2</sub> and 0.94 mM of MPA were added to 135 mL of deionized water with N<sub>2</sub> bubbled for 30 min. The mixture solution was adjusted with 1.0 M NaOH to be transparent. Then, the fresh NaHTe solution was injected into CdCl<sub>2</sub> under stirring. The molar ratios of Cd<sup>2+</sup>/NaHTe/MPA were 4:1:10. The as-prepared solution was subsequently heated to 110 °C with N<sub>2</sub> bubbled under stirring and refluxed for some time to obtain the QDs. Before usage, the QDs were purified by ultrafiltration using a 100 KD Millipore and resuspended in ultrapure water and stored at 4 °C in the dark. The concentration of the CdTe QDs were estimated to be 1.77  $\mu$ M.<sup>S2</sup>

**Preparation of CdTe-biotin.** 70  $\mu\text{L}$  1.77  $\mu\text{M}$  of CdTe QDs were suspended in 1 mL MES buffer containing EDC (40 mM) and NHS (10 mM) for 30 min, followed by centrifugation at 10 000 rpm for 30 min and resuspended in 70  $\mu\text{L}$  of PBS. The CdTe-biotin was prepared by mixing 70  $\mu\text{L}$  of the biotin functional strand (100  $\mu\text{M}$ ) and the activated CdTe QDs overnight, followed by centrifugation at 10 000 rpm for 45 min, removal of supernatant and resuspension in 70  $\mu\text{L}$  of ultrapure water.

**Preparation of avidin-PS.** Avidin-PS microspheres were synthesized using a slightly modified procedure.<sup>S3</sup> 2.5  $\mu\text{L}$  2.5% w/v of PS microspheres were suspended in 1 mL MES buffer containing EDC (40 mM) and NHS (10 mM) and mixed for 1 h, followed by centrifugation at 6000 rpm for 5 min and dissolved in 1 mL PBS. Next, 200  $\mu\text{L}$  of 0.2 mg/mL avidin was added and incubated with the microspheres for 1 h under stirring. The resulting avidin-PS microspheres were purified by centrifugation at 8000 rpm for 10 min and resuspended in 200  $\mu\text{L}$  of PBS.

**CL Spectrum.** CL emission distributed in different wavelength ranges was measured using a series of cutoff filters from 420 to 650 nm, and a fitting curve was obtained as the CL spectrum.<sup>S4,S5</sup>

**EPR analysis.** To capture and detect the  $\text{OH}^\bullet$ , 50  $\mu\text{L}$  of 1.6 M DMPO, 450  $\mu\text{L}$  of 1.77  $\mu\text{M}$  CdTe QDs, 150  $\mu\text{L}$  of 17 mM TCPO and 150  $\mu\text{L}$  of 50 mM  $\text{H}_2\text{O}_2$  containing 7.5 mM imidazole were mixed in a capillary. The analysis of  $^1\text{O}_2$  was performed similarly with TEMP instead of DMPO. During the studies on ground-state properties of CdTe QDs, no DMPO or TEMP was added in the solution.

**Fabrication of disposable protein chip.** The home-made protein chip contains 48 sensing cells.<sup>S6</sup> Briefly, 6  $\mu\text{L}$  of 10  $\mu\text{g}/\text{mL}$  Ab1 was dropped on the cell to incubate overnight at 4  $^\circ\text{C}$ . The 48 cells were then thoroughly washed with washing buffer, and the unreacted aldehyde groups were blocked with blocking buffer for 1 h. After washing, the disposable protein chip was obtained and stored in 0.01 M pH 7.4 PBS at 4  $^\circ\text{C}$  for immunoassay.

**QDs CL-based CL immunoassay.** To obtain the calibration curve for CEA or AFP, 6.0  $\mu\text{L}$  of different standard antigen solutions at known concentrations were dropped into the sensing sites and incubated for 15 min. After washing and drying, 6.0  $\mu\text{L}$  of biotin-Ab2 was added to the sensing sites for 15 min, followed by washing and drying. Then, 6.0  $\mu\text{L}$  of avidin-PS and 6.0  $\mu\text{L}$  of CdTe-biotin were sequentially dropped on the sensing cells to incubate with the sandwich immunocomplex for 15 and 20 min, respectively. After washing and drying, 3  $\mu\text{L}$  of 17 mM TCPO and 3  $\mu\text{L}$  of 50 mM  $\text{H}_2\text{O}_2$  containing 7.5

mM imidazole were added into the sensing cells respectively. The CL signals were recorded at gain 2 and 950 V.

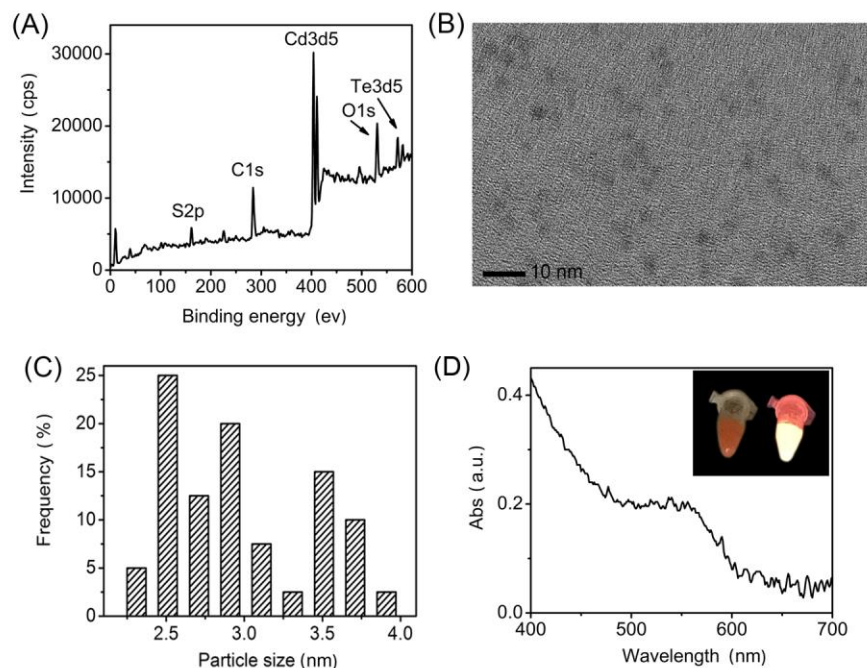

**Fig. S1** (A) XPS, (B) TEM image, (C) statistical map of the particle size distribution and (D) UV-vis spectrum of CdTe QDs. The inset in D is the photograph of CdTe QDs under visible light (left) and under 365 nm (right).

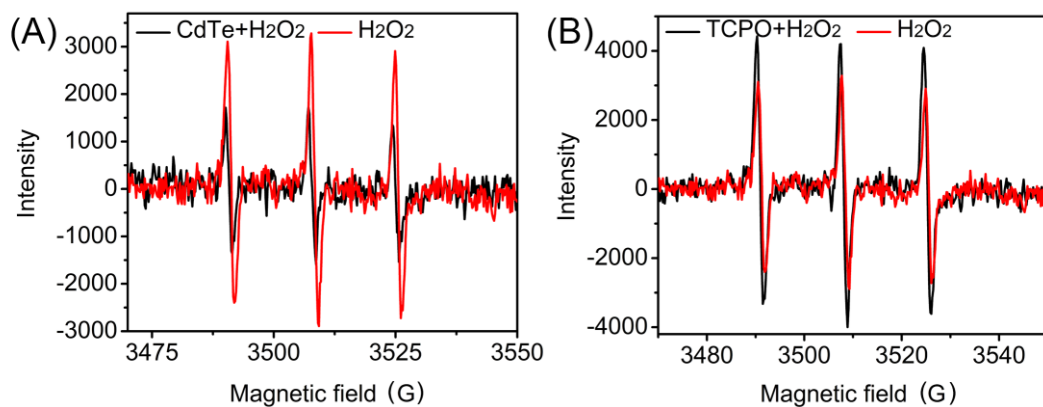

**Fig. S2** EPR spectra of  $^1\text{O}_2$  radicals in (A)  $\text{H}_2\text{O}_2$  and CdTe- $\text{H}_2\text{O}_2$  system, (B)  $\text{H}_2\text{O}_2$  and TCPO- $\text{H}_2\text{O}_2$  system. Experimental conditions: 100 mM TEMP, 1  $\mu\text{M}$  CdTe QDs, 3.2 mM TCPO, 9.4 mM  $\text{H}_2\text{O}_2$  containing 1.4 mM imidazole.

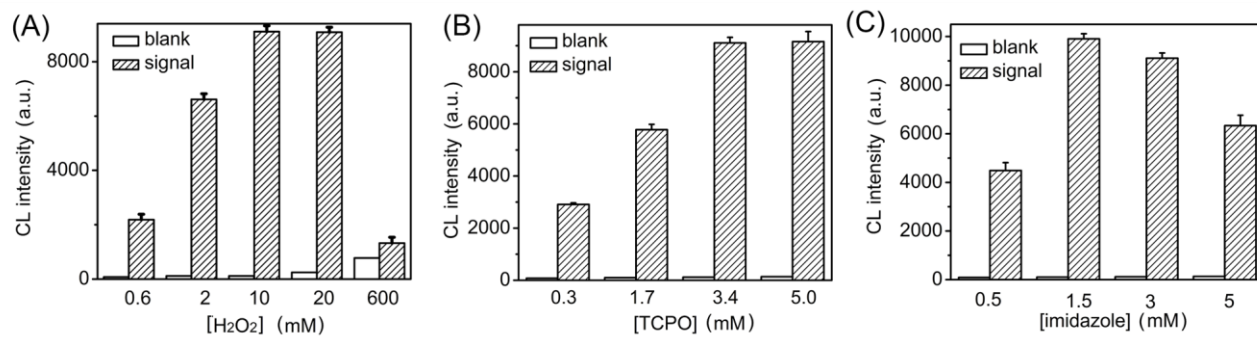

**Fig. S3** Optimization of (A) H<sub>2</sub>O<sub>2</sub>, (B) TCPO, and (C) imidazole concentrations. Blank: TCPO-H<sub>2</sub>O<sub>2</sub> CL system, signal: CdTe-TCPO-H<sub>2</sub>O<sub>2</sub> CL system, CdTe QDs: 600 nm.

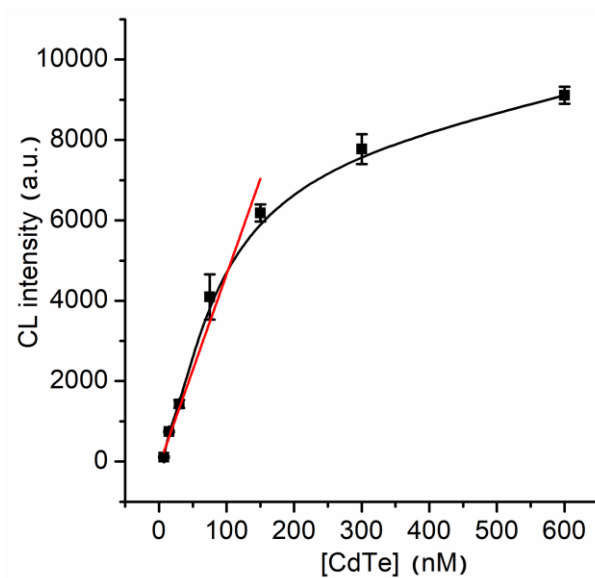

**Fig. S4** Dependence of CL intensity on CdTe QDs concentration in CdTe-TCPO-H<sub>2</sub>O<sub>2</sub> system.

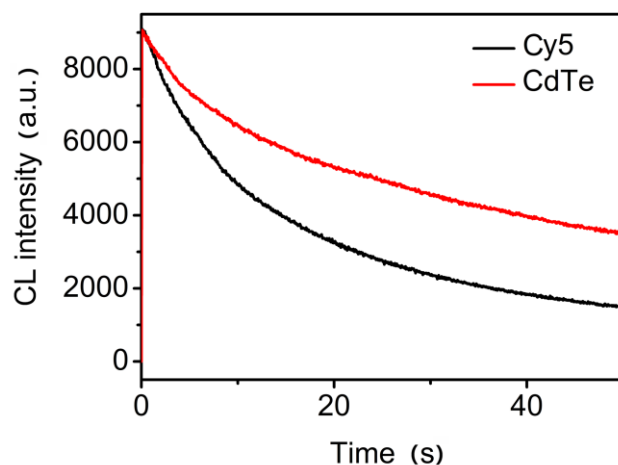

**Fig. S5** CL kinetic curves of CdTe QDs-TCPO-H<sub>2</sub>O<sub>2</sub> and TCPO-H<sub>2</sub>O<sub>2</sub>-Cy5 CL systems. Experimental conditions: 3.4 mM TCPO, 10 mM H<sub>2</sub>O<sub>2</sub>, 1.5 mM imidazole, 600 nM CdTe QDs or Cy5.

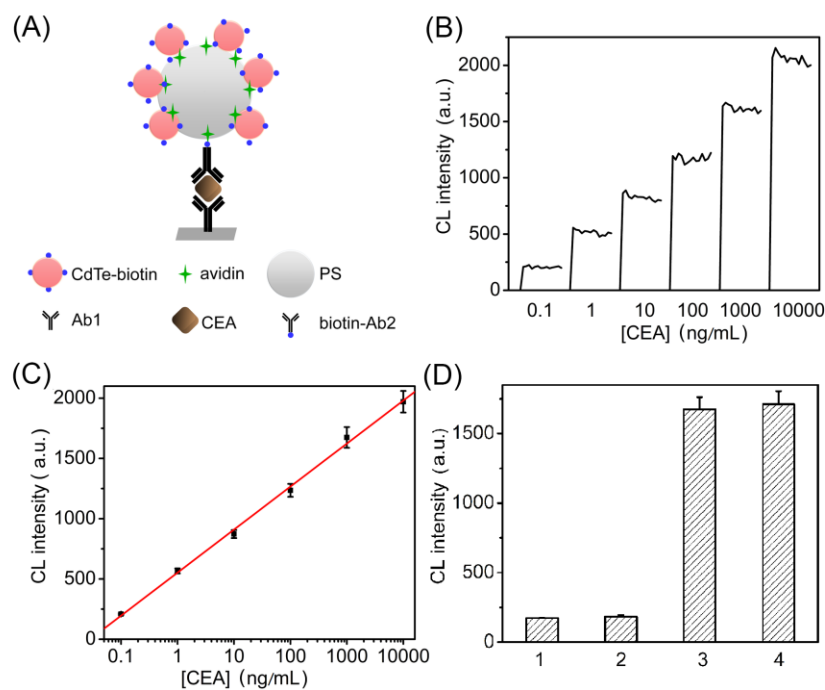

**Fig. S6** (A) Sandwich immunoassay of CEA with PS assisted CdTe QDs amplification. (B) CL responses to CEA at 0.1, 1, 10, 100, 1000, and 10000 ng/mL. (C) Calibration curve for CEA sensing. (D) Selectivity evaluation: (1) blank solution, (2) 1 KU/mL CA 199 + 1 KU/mL CA 125 + 1 µg/mL AFP, (3) 1 µg/mL CEA, (4) 1 KU/mL CA 199 + 1 KU/mL CA 125 + 1 µg/mL AFP + 1 µg/mL CEA.

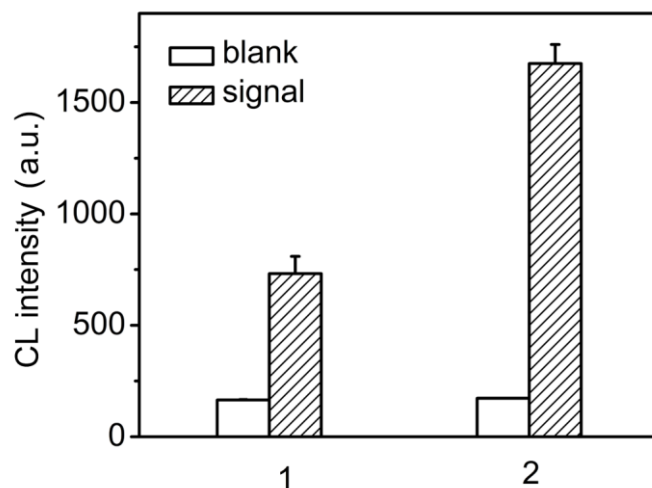

**Fig. S7** CL intensities of sandwich immunoassay of 1000 ng/mL CEA without (1) and with (2) PS assisted CdTe QDs amplification.

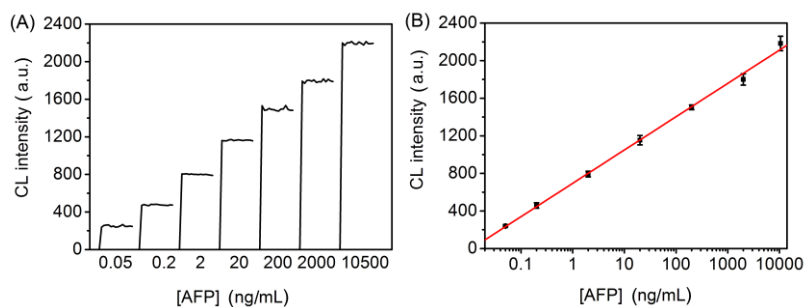

**Fig. S8** Sandwich immunoassay of AFP with PS assisted CdTe QDs amplification. (A) CL responses to AFP at 0.05, 0.2, 2, 20, 200, 2000 and 10500 ng/mL. (B) Calibration curve for AFP sensing.

**Table S1.** Effects of radical scavengers, common ions and surfactant on CdTe QDs-TCPO-H<sub>2</sub>O<sub>2</sub> system. Experimental conditions: 600 nM CdTe QDs, 3.4 mM TCPO, 10 mM H<sub>2</sub>O<sub>2</sub> containing 1.5 mM imidazole.

| Species added                 | Concentration (mol/L) | CL intensity |
|-------------------------------|-----------------------|--------------|
| /                             | /                     | 9110         |
| ascorbic acid                 | $5 \times 10^{-4}$    | 469          |
| NaN <sub>3</sub>              | $1 \times 10^{-3}$    | 8977         |
| Mg <sup>2+</sup>              | $6 \times 10^{-6}$    | 8859         |
| Ca <sup>2+</sup>              | $6 \times 10^{-6}$    | 8931         |
| Fe <sup>3+</sup>              | $6 \times 10^{-6}$    | 8993         |
| K <sup>+</sup>                | $6 \times 10^{-4}$    | 9102         |
| Na <sup>+</sup>               | $6 \times 10^{-4}$    | 9115         |
| SO <sub>4</sub> <sup>2-</sup> | $6 \times 10^{-4}$    | 9105         |
| Cl <sup>-</sup>               | $6 \times 10^{-4}$    | 9050         |
| NO <sub>3</sub> <sup>-</sup>  | $6 \times 10^{-4}$    | 8594         |
| SO <sub>3</sub> <sup>2-</sup> | $6 \times 10^{-4}$    | 8198         |
| CTAB                          | $6 \times 10^{-4}$    | 8568         |



**Table S2.** An overview of CL immunoassays of CEA and other analytes using different CL systems.

| CL system                                      | Analytes | Signal amplification                                                 | Detection range        | Detection limit        | References |
|------------------------------------------------|----------|----------------------------------------------------------------------|------------------------|------------------------|------------|
| CdTe QDs-TCPO-H <sub>2</sub> O <sub>2</sub>    | CEA      | CRET/EHA & 1:n amplification                                         | 0.1 ng/mL-10 µg/mL     | 0.092 ng/ mL (~0.3 pM) | this work  |
| luminol-H <sub>2</sub> O <sub>2</sub> -DNAzyme | CEA      | proximity-dependent DNAzyme catalysis                                | 0.16 ng/mL - 1.6 µg/mL | 0.15 ng/mL             | S6         |
| luminol-H <sub>2</sub> O <sub>2</sub> -HRP     | AFP      | microchip electrophoresis & HRP catalysis                            | 10-150 ng/mL           | 7.2 ng/mL              | S7         |
| luminol-H <sub>2</sub> O <sub>2</sub> -DNAzyme | thrombin | target-catalyzed hairpin assembly and Exo III-assisted amplification | 1-1000 pM              | 0.92 pM                | S8         |
| luminol-H <sub>2</sub> O <sub>2</sub> -MOFs    | glucose  | MIL-53(Fe) MOF-mediated catalysis                                    | 0.1-10 µM              | 0.05 µM                | S9         |
| luminol-H <sub>2</sub> O <sub>2</sub> -DNAzyme | thrombin | CRET & catalytic hemin/G-Quadruplexes                                | 1.43-86 nM             | 200 pM                 | S10        |

**Table S3.** Assay results of CEA in clinical serum samples using the proposed and reference methods.

| Sample No.                      | 1     | 2    | 3     | 4     | 5     | 6     | 7     |
|---------------------------------|-------|------|-------|-------|-------|-------|-------|
| <b>Proposed method (ng/mL)</b>  | 23.02 | 1.28 | 133.9 | 438.9 | 48.65 | 0.759 | 0.909 |
| <b>Reference method (ng/mL)</b> | 23.84 | 1.23 | 131.9 | 412.8 | 49.91 | 0.764 | 0.870 |
| <b>Relative error (%)</b>       | -3.4  | 4.1  | 1.5   | 6.3   | -2.5  | -0.7  | 4.5   |

## **Supporting references**

- (S1) J. S. W. Mak, A. A. Farah, F. F. Chen and A. S. Helmy, *ACS Nano*, 2011, **5**, 3823-3830.
- (S2) W. J. Wang, Q. Hao, W. Wang, L. Bao, J. P. Lei, Q. B. Wang and H. X. Ju, *Nanoscale*, 2014, **6**, 2710-2717.
- (S3) Y. Xiang, H. X. Zhang, B. Y. Jiang, Y. Q. Chai and R. Yuan, *Anal. Chem.*, 2011, **83**, 4302-4306.
- (S4) H. Cui, Z. F. Zhang, M. J. Shi, Y. Xu and Y. L. Wu, *Anal. Chem.*, 2005, **77**, 6402-6406.
- (S5) S. Q. Han, J. B. Wang, and S. Z. Jia, *Microchim. Acta*, 2014, **181**, 147-153.
- (S6) C. Zong, J. Wu, M. M. Liu, L. L. Yang, F. Yan and H. X. Ju, *Anal. Chem.*, 2014, **86**, 9939-9944.
- (S7) J. W. Liu, J. J. Zhao, S. T. Li, L. L. Zhang, Y. Huang and S. L. Zhao, *Talanta*, 2017, **165**, 107-111.
- (S8) P. Zou, Y. L. Liu, H. Y. Wang, J. Wu, F. F. Zhu and H. Wu, *Biosens. Bioelectron.*, 2016, **79**, 29-33.
- (S9) X. L. Yi, W. F. Dong, X. D. Zhang, J. X. Xie and Y. M. Huang, *Anal. Bioanal. Chem.*, 2016, **408**, 8805-8812.
- (S10) X. Q. Liu, R. Freeman, E. Golub and I. Willner, *ACS Nano*, 2011, **5**, 7648-7655.
